# Supplementary material
Source: PubMed Central journal article supplement (PMC166409)
Supplement: pnas_1530212100_2.pdf [file pnas_1530212100_2.pdf]

A

D P S M D P E L A M A L R L S M E E  
          <sup>224</sup> <sup>225</sup>          <sup>228</sup>                                          <sup>235</sup> <sup>237</sup> <sup>238</sup>

B

pulldown  
Rpn10: WT M224D D225A L228A S235A E237A E238A 20% input

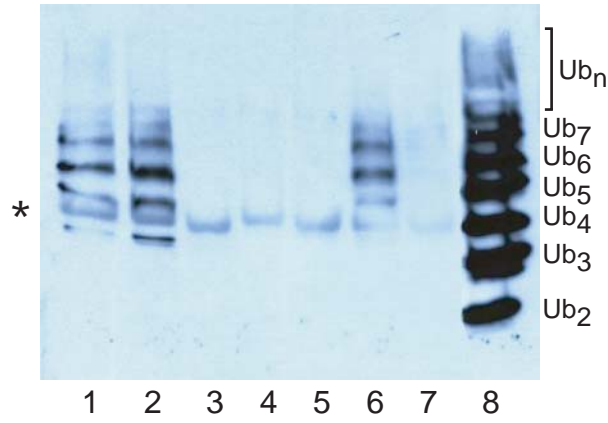

blot: Ub
