# Supplementary material
Source: PubMed Central journal article supplement (PMC166409)

Transfection:

GFP + CFP-Q27

GFP + CFP-Q78

Imaging:

CFP

GFP

CFP

GFP

GFP construct

GFP-Ub

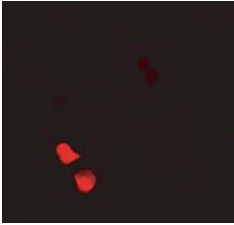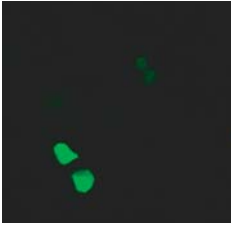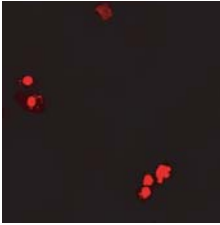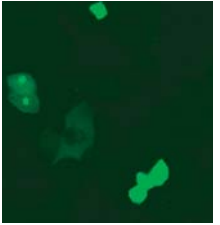

Supplement: pnas_1530212100_4.pdf [file pnas_1530212100_4.pdf]

GFP-Atx-3:  
1-373  
1-263  
1-222  
200-275  
S236A/S256A/  
S359A

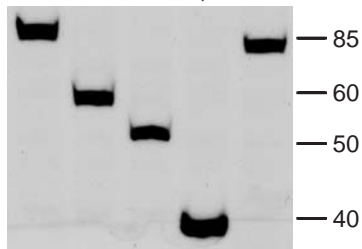

Whole cell lysates  
blot: Atx-3

Supplement: pnas_1530212100_6.pdf [file pnas_1530212100_6.pdf]
